# Supplementary material for: ISSM-SESAW v1.0: mesh-based computation of gravitationally consistent sea-level and geodetic signatures caused by cryosphere and climate driven mass change
Source: Copernicus journal article supplement (doi:10.5194/gmd-9-1087-2016), 2016-03-18
Supplement: Supplementary file [file gmd-9-1087-2016-supplement-title-page.pdf › gmd-9-1087-2016-supplement-title-page.pdf]

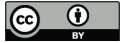

## *Supplement of*

# **ISSM-SESAW v1.0: mesh-based computation of gravitationally consistent sea-level and geodetic signatures caused by cryosphere and climate driven mass change**

**Surendra Adhikari et al.**

*Correspondence to:* Surendra Adhikari ([surendra.adhikari@jpl.nasa.gov](mailto:surendra.adhikari@jpl.nasa.gov))

- `gmd-9-1087-2016-supplement-title-page.pdf`
- `2-Adhikari_code_ais_grace`
  - `.DS_Store`
  - `Data`
    - \* `grace_monthly_load.txt`
    - \* `grace_months.txt`
    - \* `love_numbers_10k.txt`
  - `Functions`
    - \* `p_polynomial_value.m`
    - \* `sharmonics.m`
    - \* `shlm_element.m`
  - `Models`
    - \* `Earth.PSL.Mesh`
  - `Par`
    - \* `para.m`
  - `Results`
  - `runme.m`

The copyright of individual parts of the supplement might differ from the CC-BY 3.0 licence.
